# Supplementary material for: Oxidation–Responsive Emulsions Stabilized with Poly(Vinyl Pyrrolidone-co-allyl Phenyl Sulfide)
Source: PubMed Central journal article supplement (PMC7077715; doi:10.3390/polym12020498), 2020-02-24
Supplement: polymers-12-00498-s001.pdf [file polymers-12-00498-s001.pdf]

Supplementary Materials

# Oxidation-Responsive Emulsions Stabilized with Poly(vinyl pyrrolidone-co-allyl phenyl sulfide)

Seok Ho Park, Jin-Chul Kim \*

Department of Medical Biomaterials Engineering, College of Biomedical Science and Institute of Bioscience and Biotechnology, Kangwon National University, 192-1, Hyoja 2 dong, Chuncheon, Kangwon-do 200-701, Republic of Korea; sukho1002@kangwon.ac.kr

\* Correspondence: jinkim@kangwon.ac.kr; Tel.: +82 33 250 6561; Fax: +82 33 259 5645

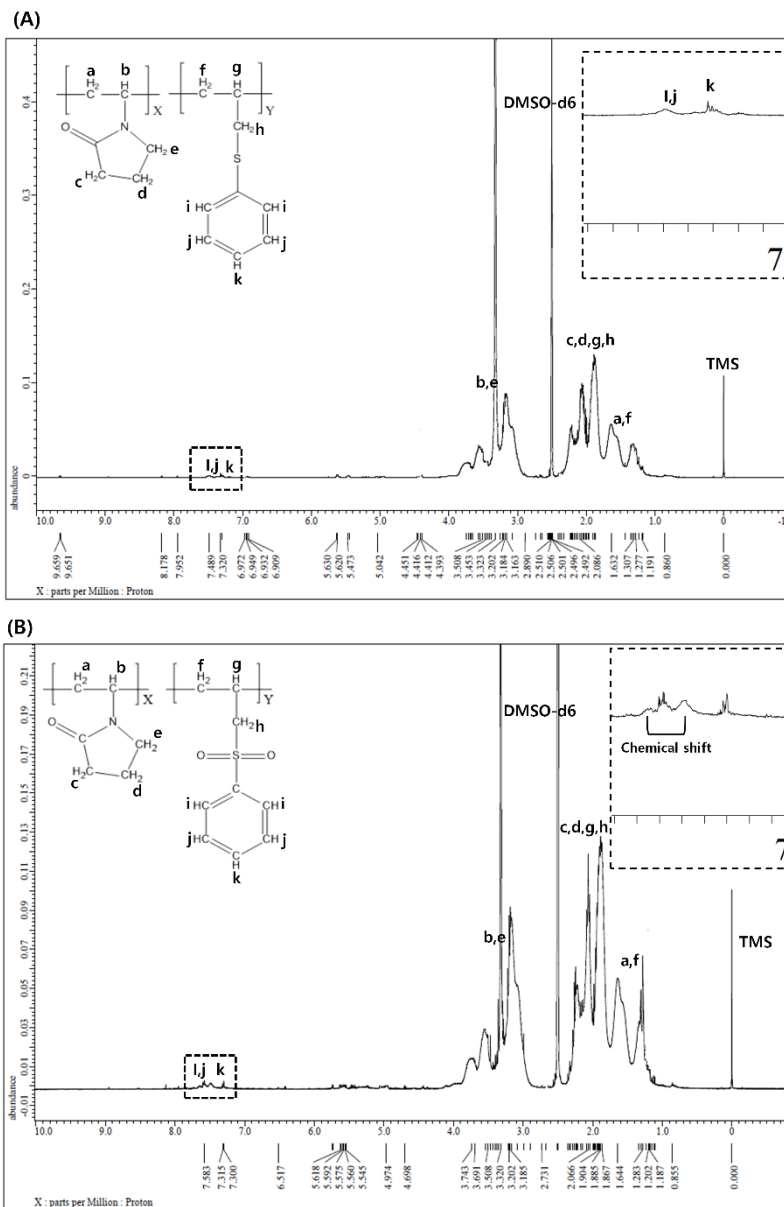

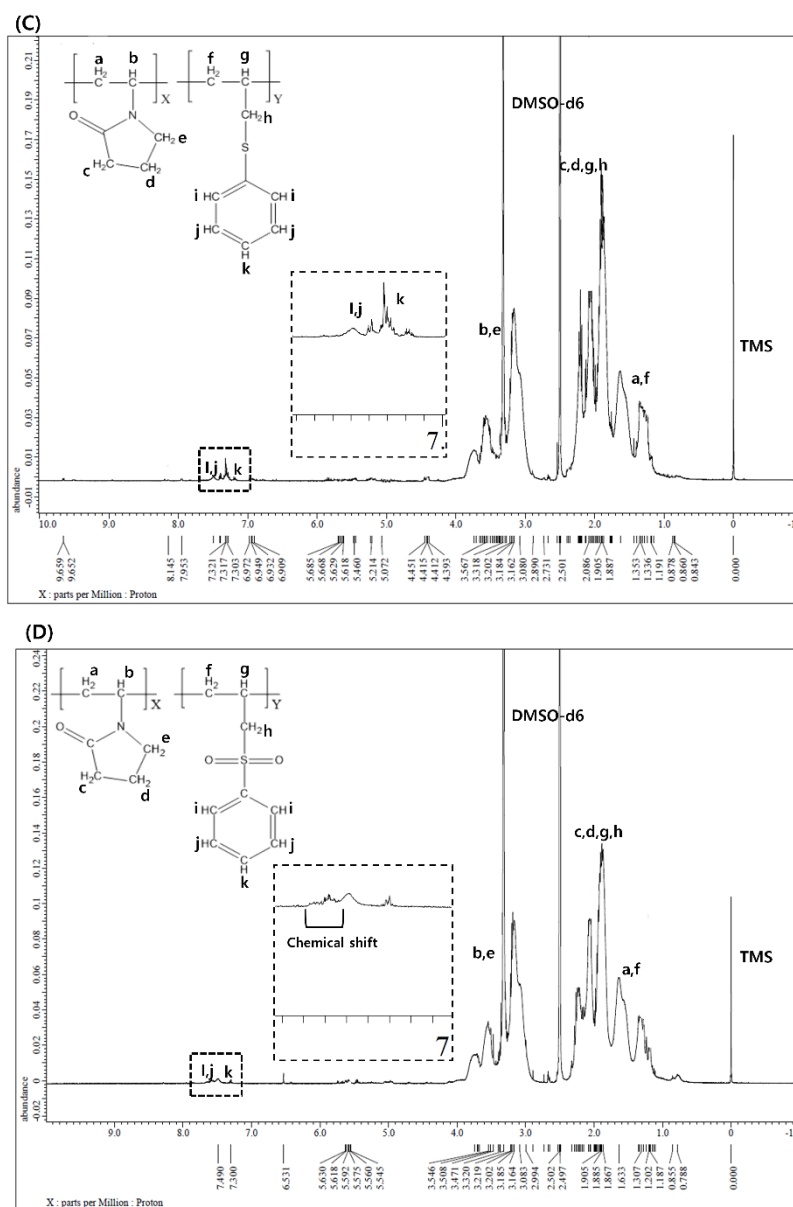

**Figure S1.** <sup>1</sup>H NMR spectrums of P(VP-APS)(97.5/2.5) (A), Oxi-P(VP-APS) (B), P(VP-APS)(96/4) (C), and Oxi-P(VP-APS)(96/4) (D).
